# Supplementary material for: LysR-type transcriptional regulator OvrB encoded in O island 9 drives enterohemorrhagic Escherichia coli O157:H7 virulence
Source: PubMed Central journal article supplement (PMC6768210; doi:10.1080/21505594.2019.1661721), 2019-09-10
Supplement: kvir-10-01-1661721-s001.pdf [file kvir-10-01-1661721-s001.pdf]

1 **LysR-type transcriptional regulator OvrB encoded in O island 9 drives**  
2 **enterohemorrhagic *Escherichia coli* O157:H7 virulence**

3

4 Yutao Liu<sup>1,2†</sup>, Bin Liu<sup>1,2†</sup>, Pan Yang<sup>1,2</sup>, Ting Wang<sup>1,2</sup>, Zhanhe Chang<sup>3</sup>, Junyue Wang<sup>1,2</sup>,  
5 Qian Wang<sup>1,2</sup>, Wendi Li<sup>1,2</sup>, Jialin Wu<sup>1,2</sup>, Di Huang<sup>1,2</sup>, Lingyan Jiang<sup>1,2</sup> and Bin  
6 Yang<sup>1,2\*</sup>

7

8

9

# 1 Supplementary Figures

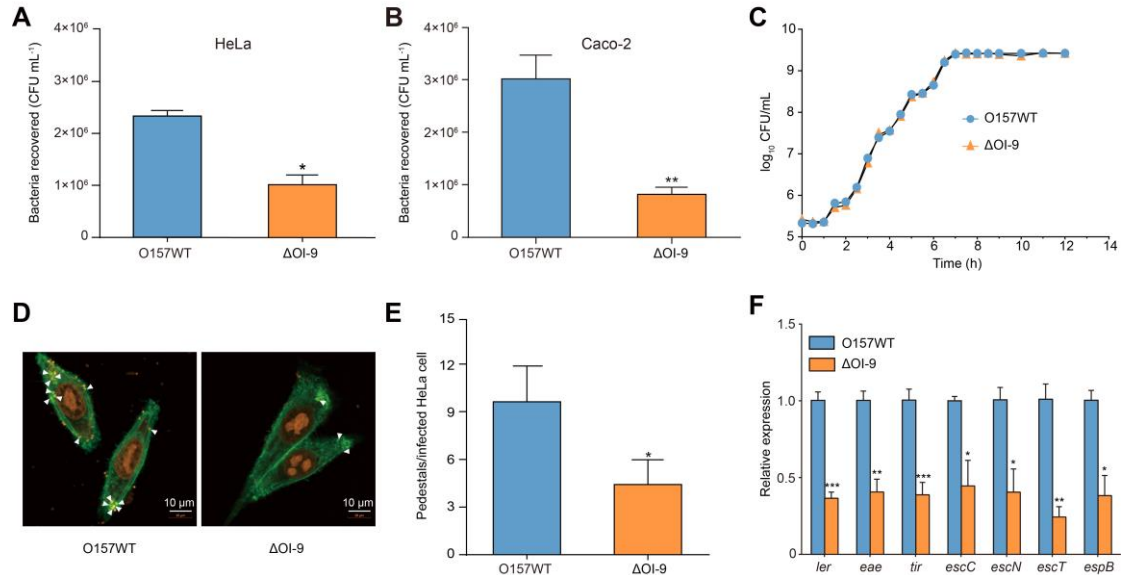

2

3 **Figure S1.** Role of OI-9 in the adherence of O157 in vitro. (A, B) Adherence of O157  
 4 WT and the  $\Delta$ OI-9 mutant to HeLa (A) and Caco-2 (B) cells. (C) Growth of O157  
 5 WT and OI-9 mutant in LB medium. (D) AE lesion formation by O157 WT and the  
 6  $\Delta$ OI-9 mutant, as evaluated by FAS in HeLa cells after 3 h. The HeLa cell actin  
 7 cytoskeleton (green) and nuclei of bacterial and HeLa cells (red) are shown. AE  
 8 lesions are indicated by arrowheads. (E) The number of pedestals/infected HeLa cell  
 9 of O157 WT and the  $\Delta$ OI-9 mutant (n = 150 cells). (F) qRT-PCR analysis of LEE  
 10 gene expression in O157 WT and the  $\Delta$  OI-9 mutant. Data represent mean  $\pm$  SD (n  
 11 = 3). \*P  $\leq$  0.05, \*\*P  $\leq$  0.01, \*\*\*P  $\leq$  0.001 (Student's t-test).

12

13

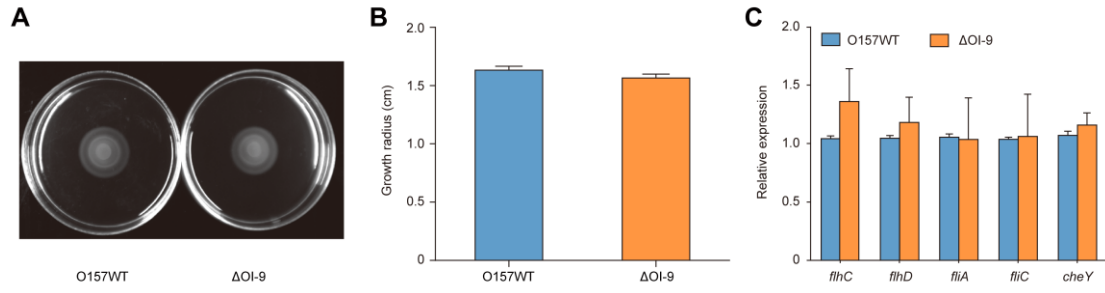

1

2 **Figure S2.** Role of OI-9 in motility and flagellar biosynthesis *in vitro*. (A, B)

3 Representative images of swimming motility (A) and quantification of growth radius

4 (B) of O157 WT and the  $\Delta$ OI-9 mutant. (C) qRT-PCR analysis of flagellar

5 biosynthesis gene expression in O157 WT and the  $\Delta$ OI-9 mutant. Data represent mean

6  $\pm$  SD (n = 3).

7

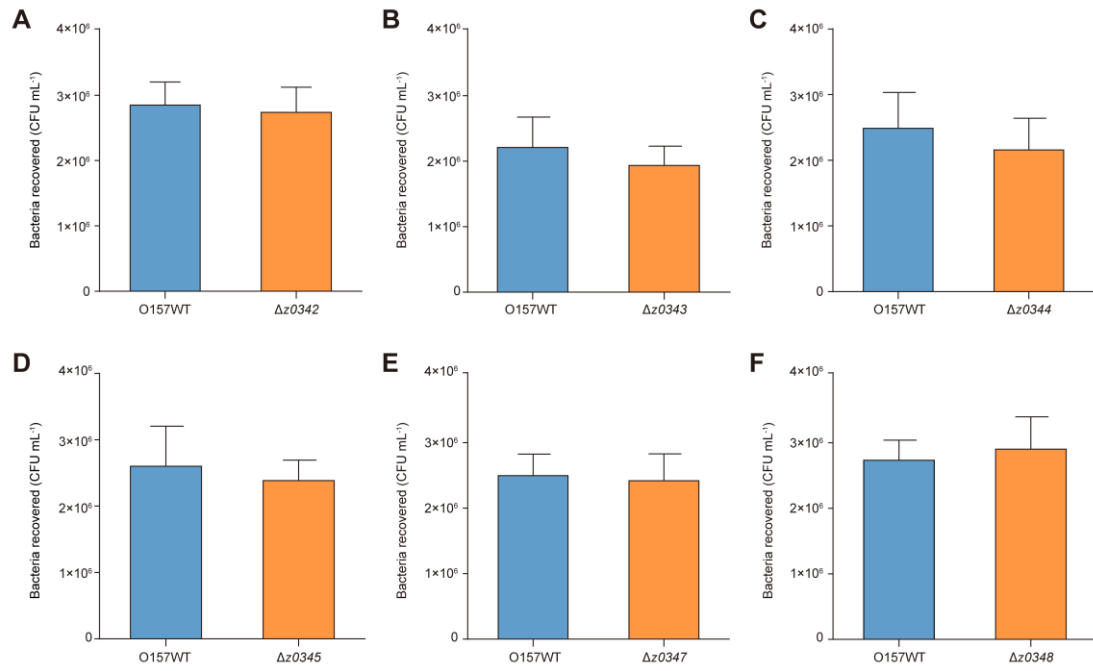

1

2 **Figure S3.** Role of  $z0342$ ,  $z0343$ ,  $z0344$ ,  $z0345$ ,  $z0347$ , and  $z0348$  in adherence to

3 HeLa cells. (A–F) Adhesion of O157 WT and  $\Delta z0342$  (A),  $\Delta z0343$  (B),  $\Delta z0344$  (C),

4  $\Delta z0345$  (D),  $\Delta z0347$  (E), and  $\Delta z0348$  (F) mutants. Data represent mean  $\pm$  SD (n = 3).

5

6

7

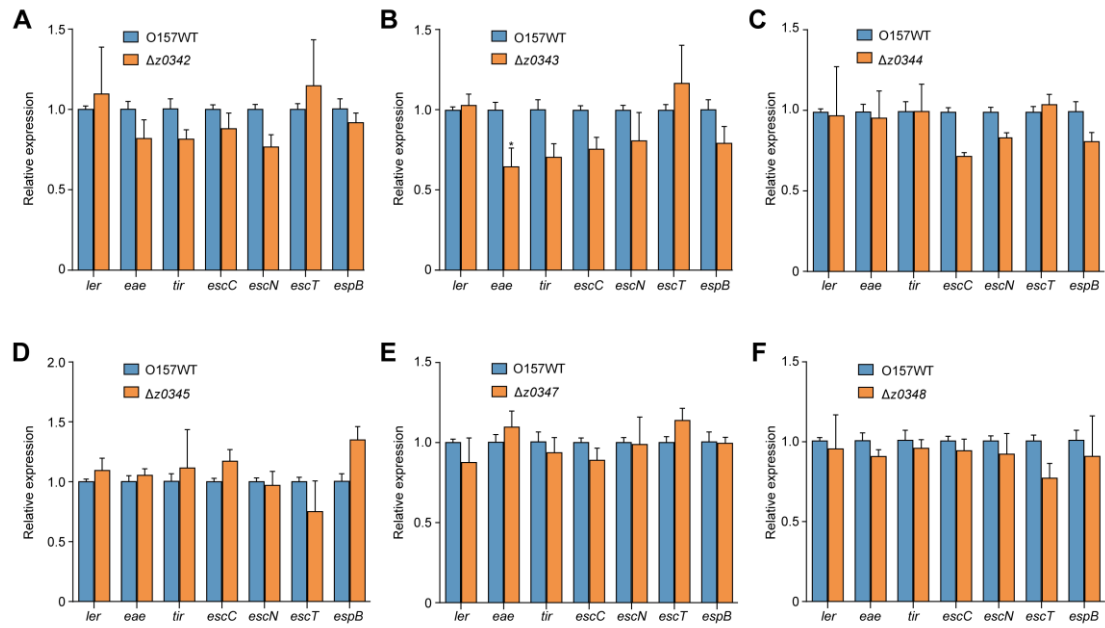

1

2 **Figure S4.** Role of *z0342*, *z0343*, *z0345*, *z0347*, and *z0348* in LEE gene expression.

3 (A–F) qRT-PCR analysis of changes in LEE gene expression in O157 WT and  $\Delta z0342$

4 (A),  $\Delta z0343$  (B),  $\Delta z0344$  (C),  $\Delta z0345$  (D),  $\Delta z0347$  (E), and  $\Delta z0348$  (F) mutants. Data

5 represent mean  $\pm$  SD (n = 3).

6

7

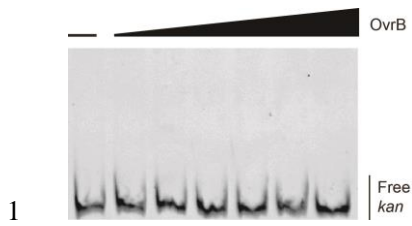

**Figure S5.** EMSA analysis of binding of the OvrB to the *kan* fragment. PCR products were added to the reaction mixtures at 40 ng each. OvrB protein was added to the reaction buffer in lanes 2–6 at 0.2, 0.4, 0.8, 1, and 2  $\mu$ M, respectively. No protein was added in lane 1.

1

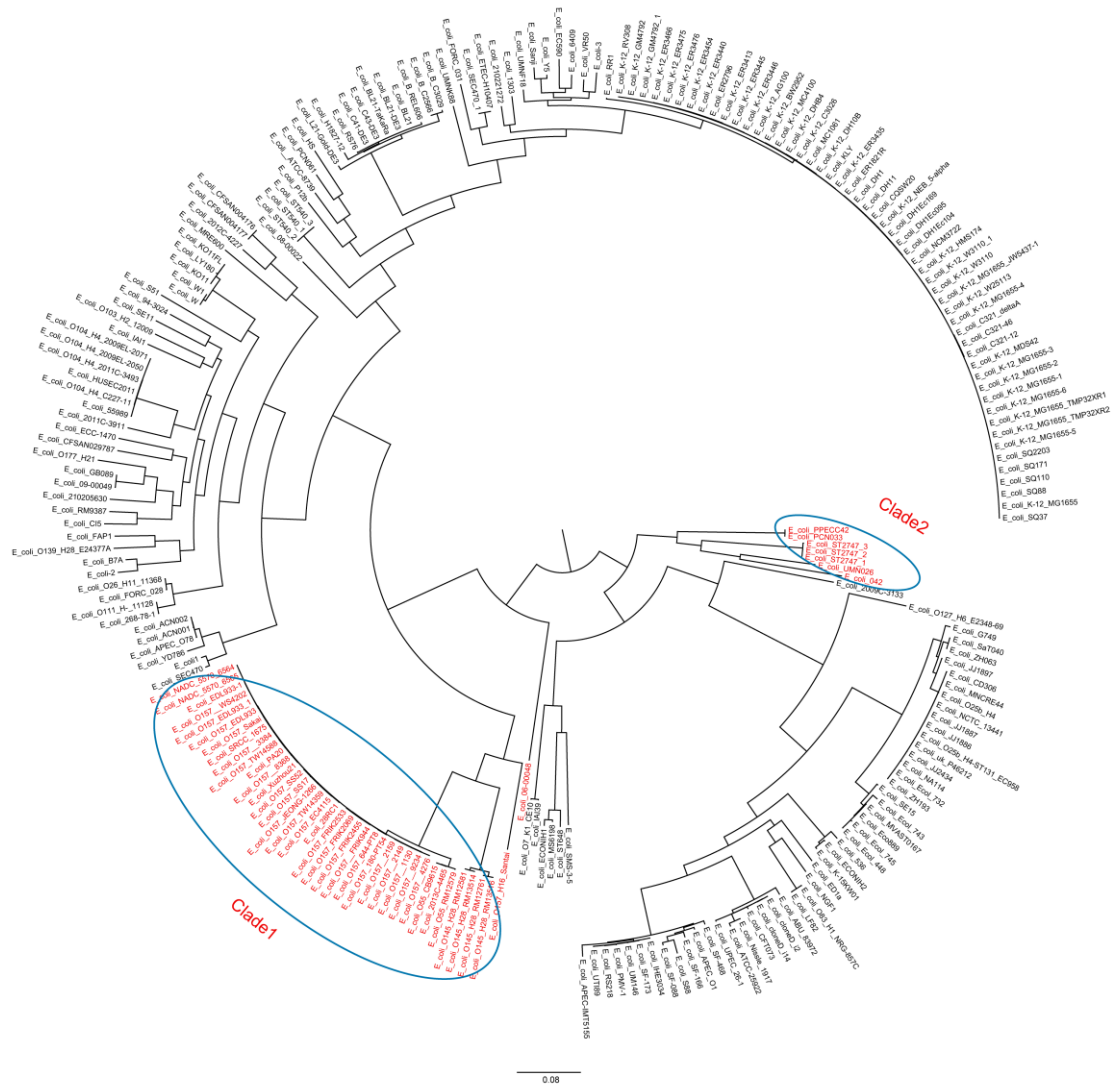

2

3 **Figure S6.** Maximum likelihood tree constructed in PhyML based on 1406  
4 single-copy core genes shared by 231 *E. coli* strains. Strains harboring OI-9 are  
5 indicated in red.

6

7

8

9

1 **Supplementary Tables**

2 **Supplementary Table 1. Strains and plasmids used in this study.**

| <b>Strains</b>  | <b>Genotype or description</b>                                                          | <b>Source or reference</b> |
|-----------------|-----------------------------------------------------------------------------------------|----------------------------|
| G2734           | Wild-type EHEC O157:H7 EDL933                                                           | ATCC*                      |
| G1345           | Wild-type EPEC O55:H7 CB9615                                                            | BfR‡                       |
| G2583           | Wild-type EPEC O145:H28                                                                 | BfR‡                       |
| H3904           | <i>z0346</i> orthologues deletion mutant in G1345                                       | This work                  |
| H3905           | <i>z0346</i> orthologues deletion mutant in G2583                                       | This work                  |
| H2505           | OI-9 deletion mutant in G2734                                                           | This work                  |
| H2600           | <i>z0342</i> deletion mutant in G2734                                                   | This work                  |
| H2577           | <i>z0343</i> deletion mutant in G2734                                                   | This work                  |
| H2601           | <i>z0344</i> deletion mutant in G2734                                                   | This work                  |
| H2602           | <i>z0345</i> deletion mutant in G2734                                                   | This work                  |
| H2578           | <i>z0346</i> deletion mutant in G2734                                                   | This work                  |
| H2579           | <i>z0347</i> deletion mutant in G2734                                                   | This work                  |
| H2580           | <i>z0348</i> deletion mutant in G2734                                                   | This work                  |
| H2674           | H2578 containing pACYC184- <i>z0346</i>                                                 | This work                  |
| H2663           | H2578 containing pTRC99A- <i>z0346</i> -3×Flag                                          | This work                  |
| H2665           | BL21(DE3) containing pET28a- <i>z0346</i>                                               | This work                  |
| H2661           | DH5α containing pACYC184- <i>z0346</i>                                                  | This work                  |
| H2662           | DH5α containing pTRC99A- <i>z0346</i> -3×Flag                                           | This work                  |
| H2664           | DH5α containing pET28a- <i>z0346</i>                                                    | This work                  |
| H2165           | ler deletion mutant in G2734                                                            | This work                  |
| H2747           | H2165 containing pKD46                                                                  | This work                  |
| H2748           | H2578 containing pKD4                                                                   | This work                  |
| H2749           | ler deletion mutant in H2578                                                            | This work                  |
| H2801           | G2734 with resistance of nalidixic acid                                                 | This work                  |
| <b>Plasmids</b> |                                                                                         |                            |
| pKD3            | Containing a chloramphenicol resistance cassette and the flipase recognition sites, CmR | BfR                        |
| pKD4            | Containing a kanamycin resistance cassette and the flipase recognition sites, KmR       | Lab collection             |
| pKD46           | Red recombination plasmid, ApR                                                          | Lab collection             |
| pET28a          | T7 expression vector, KmR                                                               | Lab collection             |
| pTRC99A         | Expression vector, ApR                                                                  | Lab collection             |
| pACYC184        | Expression vector, CmR, TcR                                                             | Novagen                    |
| pLW1810         | pACYC184 carrying <i>z0346</i> from G2734, TcR                                          | This work                  |
| pLW1812         | pET28a carrying <i>z0346</i> , KmR                                                      | This work                  |
| pLW1811         | pTRC99A carrying <i>z0346</i> -3xFLAG, ApR                                              | This work                  |

3



1   \*, ATCC, American Type Culture Collection, Manassas, Virginia, USA. †, BfR, Beutin Federal institute for Risk  
2   Assessment National Reference Laboratory for *Escherichia coli*, Berlin, Germany. ‡, Aus, School of Molecular  
3   and Microbial Biosciences, University of Sydney, Sydney, Australia.

4

1 **Supplementary Table 2. Primers used in this study (5'-3').**

| Primers for gene mutation                |   |                                                              |
|------------------------------------------|---|--------------------------------------------------------------|
| <i>OI-9</i>                              | F | GCAACCTCCGGGGACTGACGCCAGCCGATACACTTATGGTGTAGGCTGGAGCTGCTTCG  |
| <i>OI-9</i>                              | R | GGGCGTGGAAGCGCTTTCTCACCTCCGGGGGAAATACCCATATGAATATCCTCCTTAG   |
| <i>Z0342</i>                             | F | AATACTGTTCTGACATCAGGCAATGCAGGTGCAGACATGTGTAGGCTGGAGCTGCTTCG  |
| <i>Z0342</i>                             | R | CCTGCTTTCAATGTACTCAGTGGTTAGCGGCATTAACACATATGAATATCCTCCTTAG   |
| <i>Z0343</i>                             | F | TTCTATTCTCTCTCCGAACACATTTGAAGGAGAACGTAGTGTAGGCTGGAGCTGCTTCG  |
| <i>Z0343</i>                             | R | TCTGACCTATTTAATAAAACGTGAATGTAAAAGTTATTCCATATGAATATCCTCCTTAG  |
| <i>Z0344</i>                             | F | GATTATTTTTACAGGAAGTAAACATGACTCATGTTTAGTGTAGGCTGGAGCTGCTTCG   |
| <i>Z0344</i>                             | R | GTGCTTCTTGATCATGTCTTAAAAATTATACCATGAGCCCATATGAATATCCTCCTTAG  |
| <i>Z0345</i>                             | F | TAATGCTGGAGTAATCAATAGACCAGCATTAATCACAGGTGTAGGCTGGAGCTGCTTCG  |
| <i>Z0345</i>                             | R | CAATACCGTTGTTTTGTTGCAACAGTAGAATACGCGTACATATGAATATCCTCCTTAG   |
| <i>Z0346</i>                             | F | ACAATATTGCACAGTGAAGAGTCGGTCGTTGTTAACGTGTGTAGGCTGGAGCTGCTTCG  |
| <i>Z0346</i>                             | R | ATTAATGCTGAGATTGCCGGCATGAAGGGGAATGTTTCACATATGAATATCCTCCTTAG  |
| <i>Z0347</i>                             | F | TCATGCTGCTTTTCGCATCATTAAGTGGAGTCACGACAGTGTAGGCTGGAGCTGCTTCG  |
| <i>Z0347</i>                             | R | CCATAGACCGGTGGCTTTGCATCAATCAGGGGAGGTTTCATATGAATATCCTCCTTAG   |
| <i>Z0348</i>                             | F | GCCGGTGGCTTTTATCCTGATCTTTGTGAAATTTCACTGTGTAGGCTGGAGCTGCTTCG  |
| <i>Z0348</i>                             | R | CTTGTGTAACCTTTTTCAGCAACGCGGCCCTCGCCGGACCATATGAATATCCTCCTTAG  |
| <i>ler</i>                               | F | TTCCAGCTCAGTTATCGTTATCATTTAATTATTTTCATGGTGTAGGCTGGAGCTGCTTCG |
| <i>ler</i>                               | R | CTTCCTGATAAGGTCGCTAATAGCTTAAAATATTAAGCCATATGAATATCCTCCTTAG   |
| <i>z0639-01*</i>                         | F | ACAATATTGCACAGTGAAGAGTCGGTCGTTGTTAACGTGTGTAGGCTGGAGCTGCTTCG  |
| <i>z0639-01</i>                          | R | ATTAATGCTGAGATTGCCGGCATGAAGGGGAATGTTTCACATATGAATATCCTCCTTAG  |
| <i>z0639-02†</i>                         | F | ACAATATTGCACAGTGAAGAGTCGGTCGTTGTTAACGTGTGTAGGCTGGAGCTGCTTCG  |
| <i>z0639-02</i>                          | R | ATTAATGCTGAGATTGCCGGCATGAAGGGGAATGTTTCACATATGAATATCCTCCTTAG  |
| Primers for identifying the gene mutants |   |                                                              |
| <i>OI-9</i>                              | F | CAAGAGCCAGCCTCAACATC                                         |
| <i>OI-9</i>                              | R | CGATACGGCGGTCATTTTG                                          |
| <i>z0342</i>                             | F | TGGTGGCGATTATIGGTTC                                          |
| <i>z0342</i>                             | R | CTCTGCGTGCTCCCAGTAAAA                                        |
| <i>z0343</i>                             | F | CAGGATACTGGAACCAATCATAAAG                                    |
| <i>z0343</i>                             | R | AGAGGAAGCCCCACTCGTTAT                                        |
| <i>z0344</i>                             | F | ATTATTGAATCTCCCGAAAGCG                                       |
| <i>z0344</i>                             | R | CTCTACCACTCCAGACCGAAGC                                       |
| <i>z0345</i>                             | F | TGCTTCGGTCTGGAGTGGTAG                                        |
| <i>z0345</i>                             | R | ACAAGGGGACTATCCAGCAATG                                       |
| <i>z0346</i>                             | F | GCACAGTGAAGAGTCGGTCGT                                        |
| <i>z0346</i>                             | R | GTCCCCGTAATCCTAACCAACT                                       |
| <i>z0347</i>                             | F | GACCCCATCAAAGTAAAGCACC                                       |
| <i>z0347</i>                             | R | CCACTACCACAAACCGAATCAC                                       |
| <i>z0348</i>                             | F | GGTTGGCAGTAAAGACAAAGAGTT                                     |
| <i>z0348</i>                             | R | GGGTATCACCAACGAGTAGCG                                        |

|                               |   |                                                                                                            |
|-------------------------------|---|------------------------------------------------------------------------------------------------------------|
| <i>kan</i>                    | F | GCCGATTGTCTGTTGTGCC                                                                                        |
| <i>kan</i>                    | R | CGGTGCCCTGAATGAACTGC                                                                                       |
| <i>chl</i>                    | F | GGAGTGAATACCACGACGAT                                                                                       |
| <i>chl</i>                    | R | ATTGGCTGAGACGAAAAACA                                                                                       |
| <i>ler</i>                    | F | TTATTTCTTGTGGCTCAC                                                                                         |
| <i>ler</i>                    | R | ATTGTTGGTCTTCCTGAT                                                                                         |
| <i>z0639-01</i> <sup>#</sup>  |   | ACAATATTGCACAGTGAAGAGTC                                                                                    |
| <i>z0639-01</i>               |   | ATTAATGCTGAGATTGCCGGCA                                                                                     |
| <i>z0639-02</i> <sup>\$</sup> |   | AGTGAAGAGTCGGTCGTTGTTA                                                                                     |
| <i>z0639-02</i>               |   | ACAGTGAAGAGTCGGTCGTTGTT                                                                                    |
| Primers for pKD46 identifying |   |                                                                                                            |
| <i>pKD46</i>                  | F | TGAAATGCCCGTTTACCT                                                                                         |
| <i>pKD46</i>                  | R | GCCCGACTGATACGTTGA                                                                                         |
| Primers for G2734 identifying |   |                                                                                                            |
| <i>WZX</i>                    | F | CTTGGTGCTGCTCTGACATT                                                                                       |
| <i>WZX</i>                    | R | AATCGTAAGAGGGACCGTAGA                                                                                      |
| <i>fliC</i>                   | F | TCACAGTTGGCGGCGTAG                                                                                         |
| <i>fliC</i>                   | R | CATCAGCATGAAGGGTGGC                                                                                        |
| Primers for gene cloning      |   |                                                                                                            |
| <i>z0346</i>                  | F | CATGCCATGGCAAAAAGGGAGAACTACAAC                                                                             |
| <i>z0346</i>                  | R | CGCGGATCC TCAGATTTTCAATGTATCAATGAC                                                                         |
| Primers for Z0346-3×FLAG      |   |                                                                                                            |
| <i>z0346</i>                  | F | CGGGAATTCATGGCAAAAAGGGAGAACTACAAC                                                                          |
| <i>z0346</i>                  | R | CGCGGATCCTTACTATTTATCGTCGTCATCTTTGTAGTCGATATCATGATCTTTATAATCA<br>CCGTCATGGTCTTTGTAGTCGATTTTCAATGTATCAATGAC |
| Primers for CHIP-qPCR         |   |                                                                                                            |
| <i>PLEE1</i>                  | F | GCTTGGTTTTTATTCTGTTTTATTGT                                                                                 |
| <i>PLEE1</i>                  | R | ACATCTATTTTCATCAACAACCACC                                                                                  |
| <i>PLEE2/3</i>                | F | ATTTCCCAATAATCTTAAAAACTCTTC                                                                                |
| <i>PLEE2/3</i>                | R | AATCACTCCTGTCTTCTCATCCAC                                                                                   |
| <i>PLEE4</i>                  | F | CCGATTACGCATCGCACC                                                                                         |
| <i>PLEE4</i>                  | R | CATTAGCCATTGGAAACTCACG                                                                                     |
| <i>PLEE5</i>                  | F | ATGTTTCAGCCGTTTATCGACTAC                                                                                   |
| <i>PLEE5</i>                  | R | GGGATTATGACCAAGATTACCAA                                                                                    |
| <i>rpos</i>                   | F | GTTATCGCAGGGAGCCACA                                                                                        |
| <i>rpos</i>                   | R | TTTTACCACCAGACGCAAGTTA                                                                                     |
| Primers for EMSA              |   |                                                                                                            |
| <i>PLEE1</i>                  | F | TCCTGGGGATTCACTCGCTTG                                                                                      |
| <i>PLEE1</i>                  | R | TCATAATAAATAATCTCCGC                                                                                       |
| <i>PLEE2/3</i>                | F | CATTACTGCACCAGAAGGAC                                                                                       |
| <i>PLEE2/3</i>                | R | AGATTCATCTGCAGGCTCTG                                                                                       |
| <i>PLEE4</i>                  | F | CGCATCGCACCATTGAGAAG                                                                                       |

|                    |   |                             |
|--------------------|---|-----------------------------|
| <i>PLEE4</i>       | R | CATTAGCCATTGGAAACTCACG      |
| <i>PLEE5</i>       | F | TAGTTTGCTTAATTGGTTTTCTTTGGC |
| <i>PLEE5</i>       | R | ACCAATAGGCATAAAATATCTC      |
| <i>rpos</i>        | F | GTTATCGCAGGGAGCCACA         |
| <i>rpos</i>        | R | TTTTACCACCAGACGCAAGTTA      |
| <i>kan</i>         | F | TCACTCATTAGGCACCCCAG        |
| <i>kan</i>         | R | CTCTTCGCTATTACGCCAGC        |
| Primers for RT-PCR |   |                             |
| <i>rrsH</i>        | F | GAAAGCGTGGGGAGCAAAC         |
| <i>rrsH</i>        | R | ACATGCTCCACCGCTTGTG         |
| <i>escC</i>        | F | GACCAAAATGTTGTCGTCCCA       |
| <i>escC</i>        | R | AGGTTACCGCTTCGCTCG          |
| <i>eae</i>         | F | GACGGTAGTTCACTGGACTTCTT     |
| <i>eae</i>         | R | TCGCCACCAATACCTAAACG        |
| <i>tir</i>         | F | AAAGCAGCAGGCGAAGAGG         |
| <i>tir</i>         | R | TCGGCACCTGCGAATCAT          |
| <i>ler</i>         | F | CAGGAAGCAAAGCGACTG          |
| <i>ler</i>         | R | ACCAGGTCTGCCCTTCTT          |
| <i>escT</i>        | F | GCAATAGATGCGGCTGGAC         |
| <i>escT</i>        | R | TCGGCTTGTAATGGTAATATCTCG    |
| <i>escN</i>        | F | AGGTTTTCTTGTTGCCTTTTGA      |
| <i>escN</i>        | R | TCTCCATTGGTCTGCCTATGC       |
| <i>espB</i>        | F | AAAACCTCCTCGGCAAGATGG       |
| <i>espB</i>        | R | AATAATCCCGCCAACCAAAG        |
| <i>flhC</i>        | F | GTAATGGCGTCGATGCGGTGAT      |
| <i>flhC</i>        | R | CCAATGTCCAGGCACGGGTAA       |
| <i>flhD</i>        | F | CGTTAGCGGCACTGACTCTTCC      |
| <i>flhD</i>        | R | TCAGCAAGCGTGTGAGAGCAT       |
| <i>fliA</i>        | F | GATGAACTTCGCAGCCGTGACT      |
| <i>fliA</i>        | R | GATGAACTTCGCAGCCGTGACT      |
| <i>fliC</i>        | F | TCACAGTTGGCGGCGTAG          |
| <i>fliC</i>        | R | CATCAGCATGAAGGGTGGC         |
| <i>cheY</i>        | F | ATGTTGAGGAAGCGGAAGATG       |
| <i>cheY</i>        | R | AGTCACCATTAACACTGGCAAT      |
| <i>z0342</i>       | F | GCGTAAGGCTCGGAGAGGTCAT      |
| <i>z0342</i>       | R | TGCTGTTGGCTGCGAGATAGGA      |
| <i>z0343</i>       | F | AATCCGTGTGACCTGCGTAAATCC    |
| <i>z0343</i>       | R | CAGAACGGTAGGCGTCCATTGC      |
| <i>z0344</i>       | F | ACTCATCCTCTCAATTGTCAGGGAA   |
| <i>z0344</i>       | R | ATGGTTGAACCGACGGCAGTAAT     |
| <i>z0345</i>       | F | CAGACAGAAATGGTTAAATCGTCSA   |
| <i>z0345</i>       | R | CGGCAATAAACTGTTTCATTCACTG   |

|              |   |                           |
|--------------|---|---------------------------|
| <i>z0346</i> | F | GGGTCTTGCTCAGTCAGGAGTCA   |
| <i>z0346</i> | R | CTGCTTGCGTCAGCGACAGTT     |
| <i>z0347</i> | F | GGATGGCGAAGACCGTTATTCTACC |
| <i>z0347</i> | R | CACTGACCTTGCCGTGCTATCG    |
| <i>z0348</i> | F | TCTGGATGGTCTCGCTGCTGTT    |
| <i>z0348</i> | R | GCTTCGGCGTTGTCAGGCAA      |

1 \* , # , *z0346*-01, *z0346* orthologues in G2583; †, § *z0346*-02, *z0346* orthologues in G1345;

2

1 **Supplementary Table 3. The orthologous genes of *ovrB* in different sequenced *E.***

2 ***coli* genomes**

| Strains                                           | Pathotype* | Clade  | Orthologous gene  | Identical with <i>ovrB</i> (%) |            |
|---------------------------------------------------|------------|--------|-------------------|--------------------------------|------------|
|                                                   |            |        |                   | Nucleic acid                   | Amino acid |
| <i>Escherichia coli</i> O157:H7 str. Sakai        | EHEC       | Clade1 | ECs_0309          | 100                            | 100        |
| <i>Escherichia coli</i> O157:H7 str. TW14359      | EHEC       | Clade1 | ECSP_RS01640      | 100                            | 100        |
| <i>Escherichia coli</i> O157:H7 str. Xuzhou21     | EHEC       | Clade1 | CDCO157_RS01620   | 100                            | 100        |
| <i>Escherichia coli</i> O157:H7 strain FRIK2069   | EHEC       | Clade1 | A8V30_01765       | 100                            | 100        |
| <i>Escherichia coli</i> O157:H7 strain FRIK2455   | EHEC       | Clade1 | A8V32_01770       | 100                            | 100        |
| <i>Escherichia coli</i> O157:H7 strain FRIK2533   | EHEC       | Clade1 | A8V31_01765       | 100                            | 100        |
| <i>Escherichia coli</i> O157:H7 strain SRCC 1675  | EHEC       | Clade1 | AR439_19665       | 100                            | 100        |
| <i>Escherichia coli</i> O157:H7 strain 28RC1      | EHEC       | Clade1 | ARC77_20930       | 100                            | 100        |
| <i>Escherichia coli</i> O157:H7 strain JEONG-1266 | EHEC       | Clade1 | JEONG1266_18765   | 100                            | 100        |
| <i>Escherichia coli</i> O157:H7 strain WS4202     | EHEC       | Clade1 | AO055_01605       | 100                            | 100        |
| <i>Escherichia coli</i> O157:H7 str. SS52         | EHEC       | Clade1 | SS52_RS01620      | 100                            | 100        |
| <i>Escherichia coli</i> O157:H7 str. SS17         | EHEC       | Clade1 | SS17_RS01620      | 100                            | 100        |
| <i>Escherichia coli</i> O157:H7 str. EC4115       | EHEC       | Clade1 | ECH74115_RS02170  | 100                            | 100        |
| <i>Escherichia coli</i> O55:H7 str. RM12579       | EPEC       | Clade1 | ECO55CA74_RS01875 | 99.89                          | 99.66      |
| <i>Escherichia coli</i> O55:H7 str. CB9615        | EPEC       | Clade1 | G2583_RS01880     | 99.89                          | 99.66      |
| <i>Escherichia coli</i> strain 2013C-4465         | STEC       | Clade1 | CSR56_18075       | 99.89                          | 99.66      |
| <i>Escherichia coli</i> O145:H28 str. RM12581     | EHEC       | Clade1 | ECRM12581_RS01295 | 98.34                          | 98.64      |
| <i>Escherichia coli</i> O145:H28 str. RM13514     | EHEC       | Clade1 | ECRM13514_0260    | 98.34                          | 98.64      |
| <i>Escherichia coli</i> O145:H28                  | EHEC       | Clade1 | ECRM12761_RS01300 | 98.34                          | 98.64      |

|                                                  |       |        |                 |       |       |
|--------------------------------------------------|-------|--------|-----------------|-------|-------|
| str. RM12761                                     |       |        |                 |       |       |
| <i>Escherichia coli</i> O145:H28<br>str. RM13516 | EHEC  | Clade1 | ECRM13516_0258  | 98.34 | 98.64 |
| <i>Escherichia coli</i> 06-00048                 | STEC  | Clade1 | GJ11_01660      | 98.19 | 98.30 |
| <i>Escherichia coli</i> ST2747                   | ExPEC | Clade2 | CF60_05715      | 97.97 | 98.30 |
| <i>Escherichia coli</i> UMN026                   | ExPEC | Clade2 | ECUMN_0311      | 97.97 | 98.30 |
| <i>Escherichia coli</i> PCN033                   | ExPEC | Clade2 | PPECC33_RS01625 | 97.85 | 97.96 |
| <i>Escherichia coli</i> O157:H16<br>str. Santai  | EHEC  | Clade1 | CP007592        | 97.85 | 97.96 |
| <i>Escherichia coli</i> 042                      | ExPEC | Clade2 | EC042_RS01660   | 97.74 | 97.96 |
| <i>Escherichia coli</i> PPECC42                  | ExPEC | Clade2 | AWH70_RS01620   | 97.74 | 97.96 |

1 \*: EHEC, enterohemorrhagic *Escherichia coli*; EPEC, enteropathogenic *Escherichia coli*; STEC, Shiga

2 toxin-producing *Escherichia coli*; ExPEC, extraintestinal pathogenic *Escherichia coli*;

3

4

1 **Supplementary Table 4. The blast results of OI-9 in different representative**

2 **intestinal pathogens**

| Strains                                           | Query cover | Identity |
|---------------------------------------------------|-------------|----------|
| Enteropathogenic <i>Escherichia coli</i> O55:H7   | 100%        | 99%      |
| <i>Citrobacter freundii</i> strain BD             | 61%         | 93%      |
| <i>Serratia marcescens</i> subsp. marcescens Db11 | 57%         | 88%      |
| <i>Enterobacter cloacae</i> strain GEO_49_Up_B    | 54%         | 75%      |
| <i>Klebsiella oxytoca</i> strain CAV1374          | 55%         | 80%      |

3
